# Supplementary material for: Early Life Origins of Lung Ageing: Early Life Exposures and Lung Function Decline in Adulthood in Two European Cohorts Aged 28-73 Years
Source: PubMed Central journal article supplement (PMC4728209; doi:10.1371/journal.pone.0145127), 2016-01-26

# Early life origins of lung ageing

Julia Dratva et al.

S- Figure 1: European map and regional distribution of SAPALDIA and ECRHS study centers

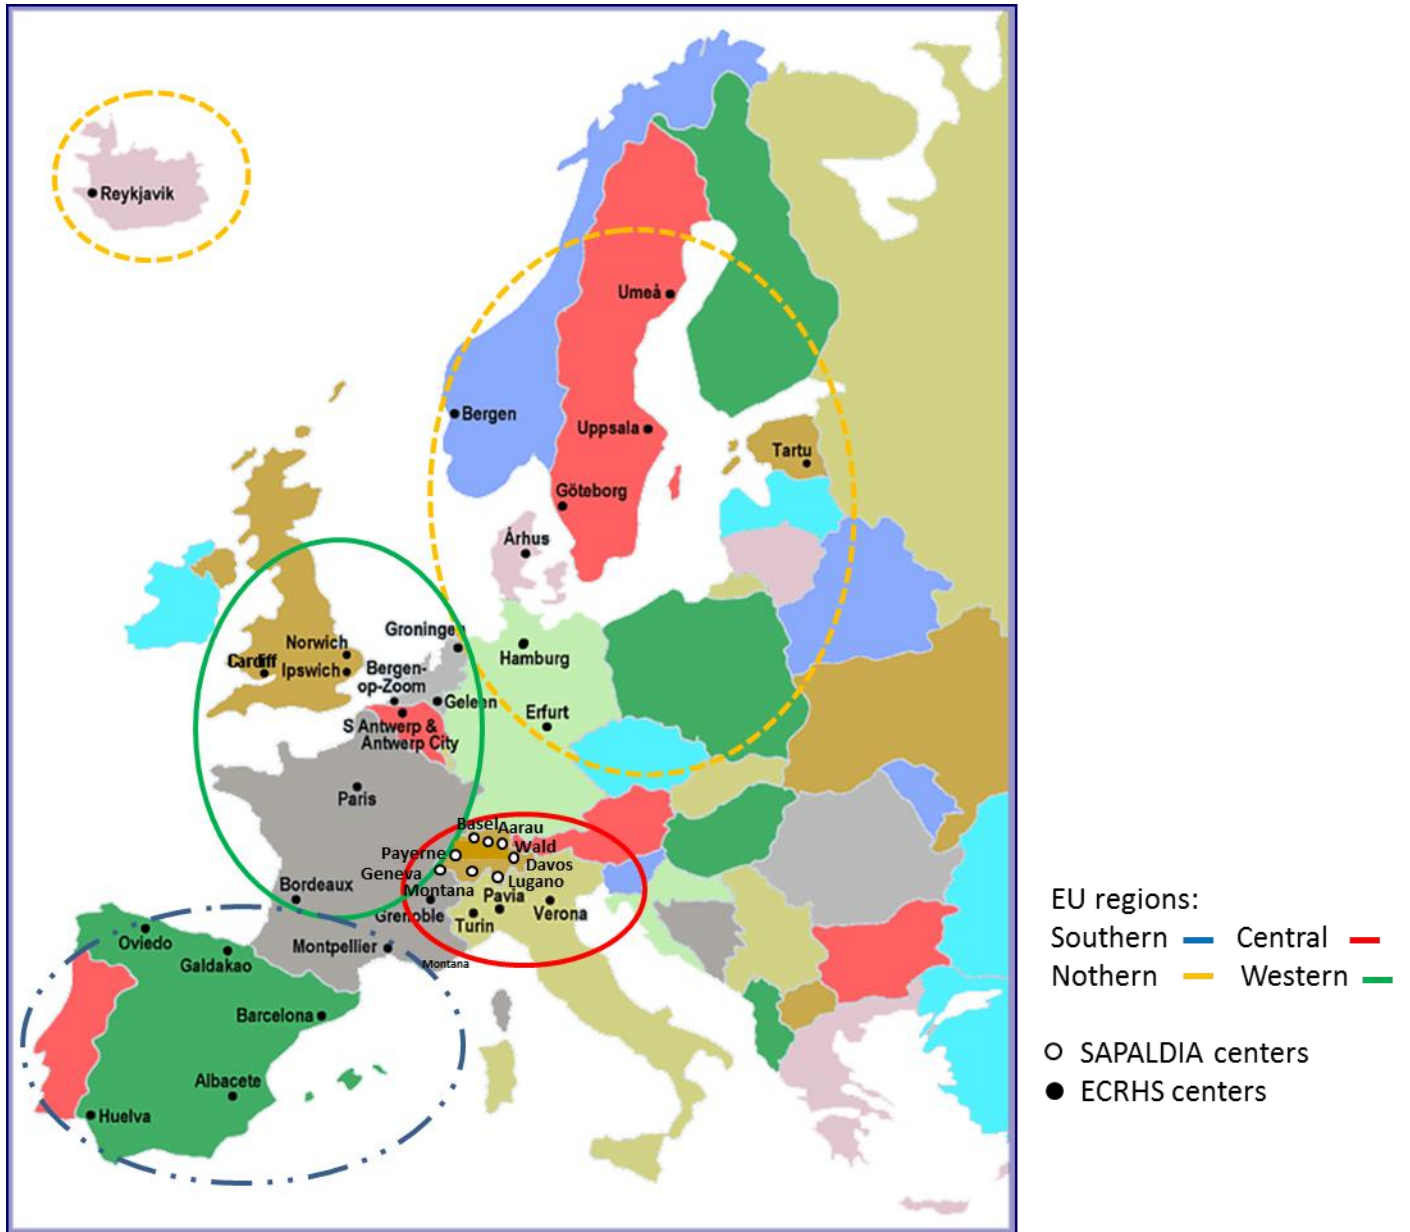

Supplement: pone.0145127.s001.pdf [file pone.0145127.s001.pdf]
