# Supplementary material for: Early Life Origins of Lung Ageing: Early Life Exposures and Lung Function Decline in Adulthood in Two European Cohorts Aged 28-73 Years
Source: PubMed Central journal article supplement (PMC4728209; doi:10.1371/journal.pone.0145127), 2016-01-26
Supplement: pone.0145127.s002.pdf [file pone.0145127.s002.pdf]

## Early life origins of lung ageing

Julia Dratva et al.

S-Figure 2: Meta-analyses across European regions: Association of early life factors and lung function decline <sup>α</sup>

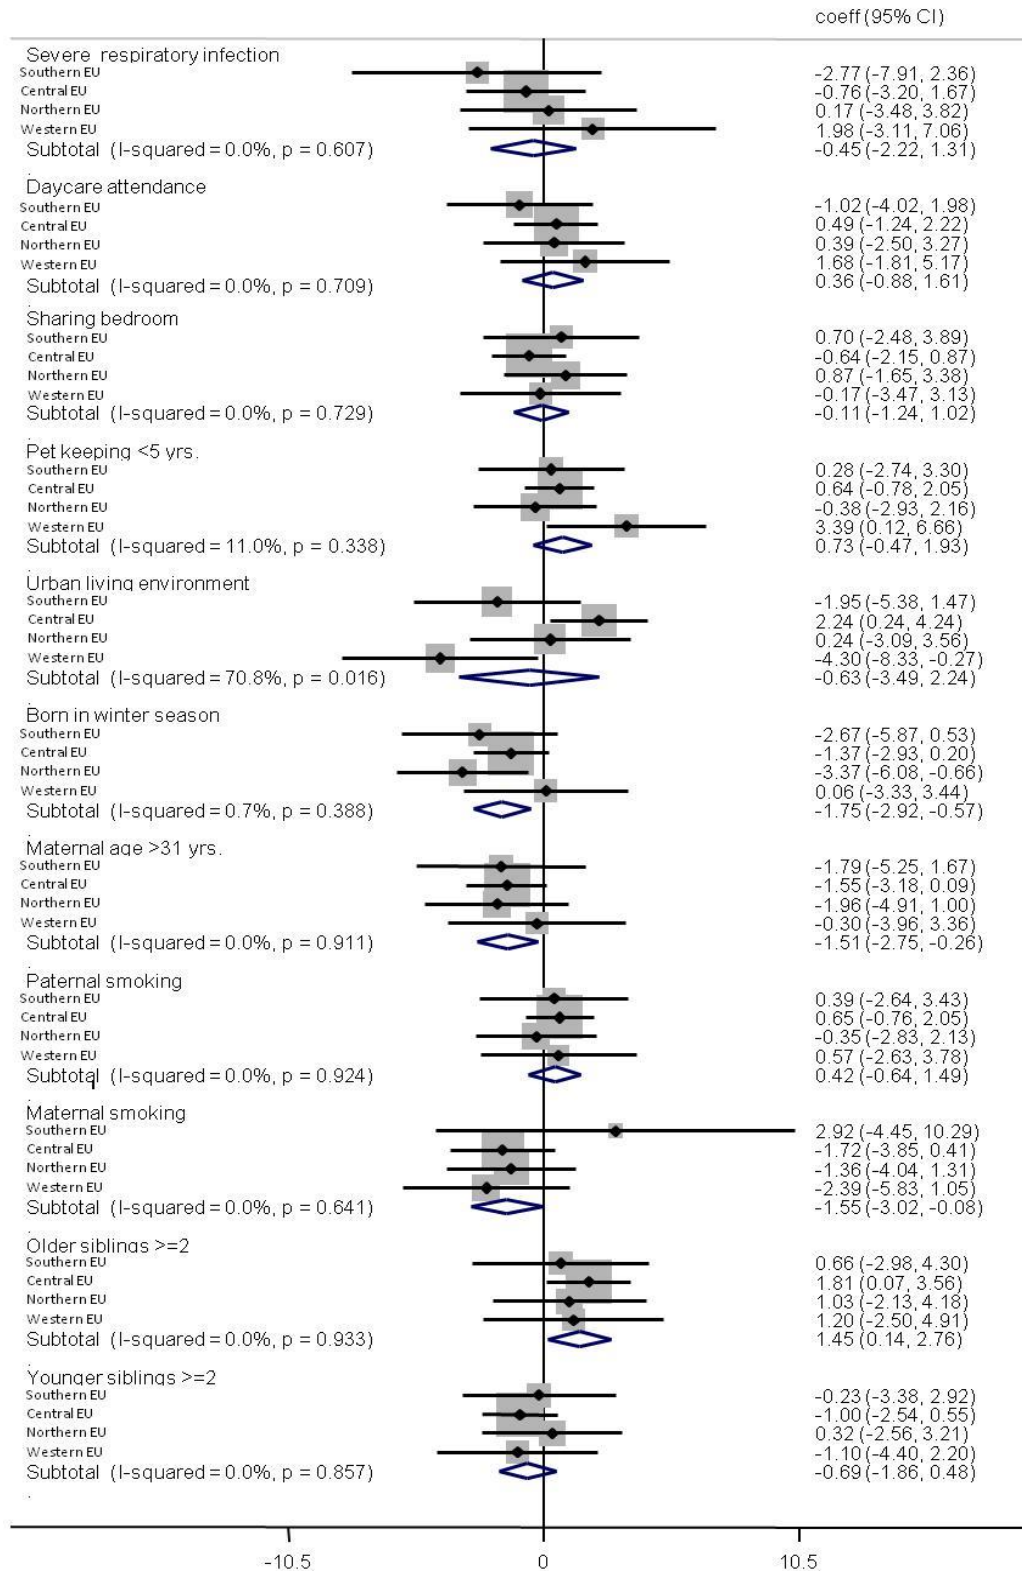

$\Delta$ FEV<sub>1</sub>/yr = adjusted change in FEV1 (ml) per year of follow-up

<sup>α</sup> mutually adjusted for all other early life factors investigated and for sex, mid age, mid age square, mid BMI, change in BMI (between survey 1 and 2), height, pack years smoked, age at highest education, study area (random effect)
