# Supplementary material for: Early Life Origins of Lung Ageing: Early Life Exposures and Lung Function Decline in Adulthood in Two European Cohorts Aged 28-73 Years
Source: PubMed Central journal article supplement (PMC4728209; doi:10.1371/journal.pone.0145127), 2016-01-26
Supplement: pone.0145127.s003.pdf [file pone.0145127.s003.pdf]

## Early life origins of lung ageing

Julia Dratva et al.

S-Table 1: Impact of single early life factors on lung function decline ‡

| Early life factors           | $\Delta$ FEV <sub>1</sub> /yr. † | 95% CI       | p-value |
|------------------------------|----------------------------------|--------------|---------|
| Season of birth: winter      | -2.00                            | -3.25, -0.75 | <0.001  |
| Maternal age (>31 yrs.)      | -1.12                            | -2.31; 0.06  | <0.001  |
| Maternal smoking             | -1.42                            | -2.87; 0.04  | 0.02    |
| Paternal smoking             | 0.38                             | -0.74; 1.50  | 0.32    |
| Severe respiratory infection | -0.36                            | -2.22; 1.50  | 0.57    |
| Urban living environment     | 0.61                             | -0.85; 2.07  | 0.41    |
| Daycare attendance           | 3.92                             | 2.72; 5.12   | <0.001  |
| Sharing bedroom              | -0.46                            | -1.55; 0.06  | 0.28    |
| Family pet (< 5yrs.)         | 0.62                             | -0.50; 1.73  | 0.12    |
| Older siblings $\geq 2$      | 0.24                             | -0.94; 1.42  | 0.13    |
| Younger siblings <2          | -2.13                            | -3.32; -0.95 | <0.001  |

†  $\Delta$ FEV<sub>1</sub>/yr. corresponds to change in FEV<sub>1</sub> (ml) by follow up year – a negative coefficient implies more rapid FEV<sub>1</sub> decline and a positive coefficient implies less rapid decline.

‡ adjusted for sex, mid age, mid age square, mid BMI, change in BMI (between survey 1 and 2), height, pack years smoked, age at highest education, European region (random effect)

CI = Confidence Interval
